# Supplementary material for: SUMO protease and proteasome recruitment at the nuclear periphery differently affect replication dynamics at arrested forks
Source: PubMed Central journal article supplement (PMC11317160; doi:10.1093/nar/gkae526), 2024-06-25
Supplement: gkae526_supplemental_file.pdf [file gkae526_supplemental_file.pdf]

**SUMO protease and proteasome recruitment at the nuclear periphery differently affect replication dynamics at arrested forks.**

Kamila Schirmeisen<sup>1,2,#</sup>, Karel Naiman<sup>3,4,#</sup>, Karine Fréon<sup>1,2</sup>, Laetitia Besse<sup>5</sup>, Shrena Chakraborty<sup>1,2</sup>, Anissia Ait Saada<sup>1,2</sup>, Antony M. Carr<sup>4</sup>, Karol Kramarz<sup>6,\*</sup> and Sarah AE Lambert<sup>1,2,7,\*</sup>

**Supplemental Figures**

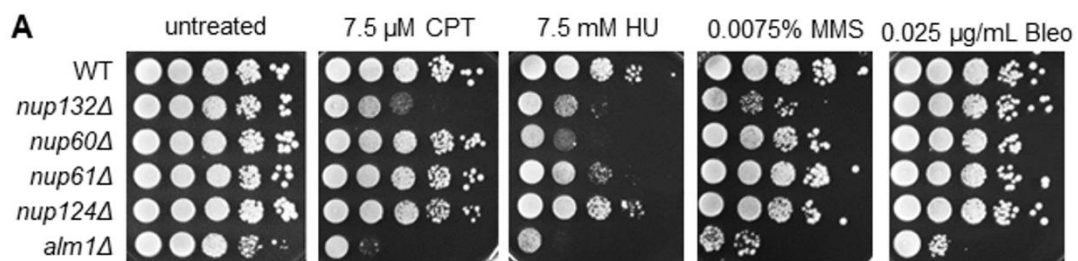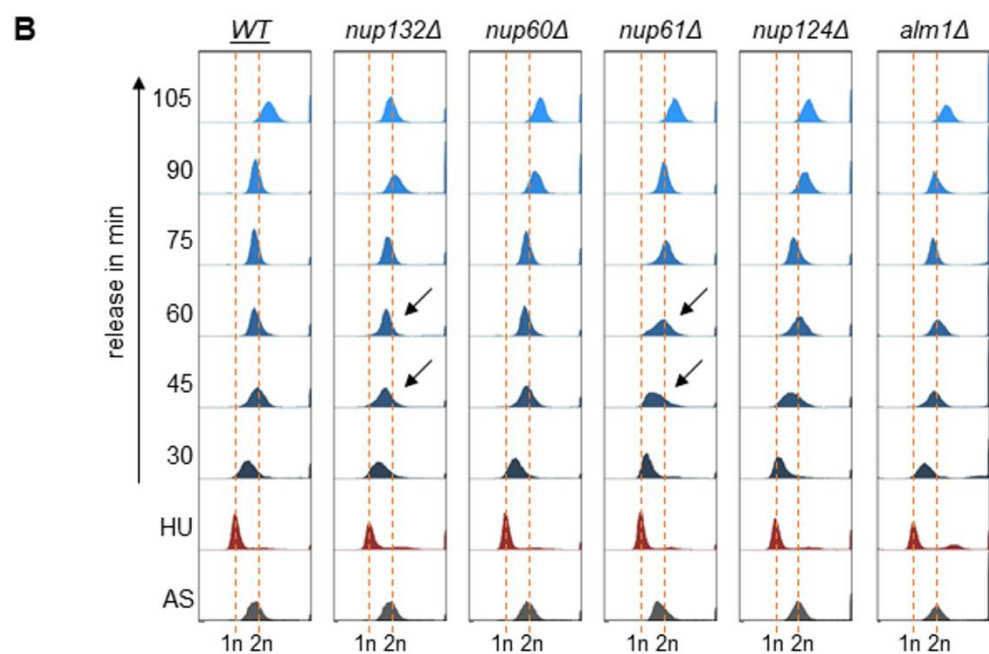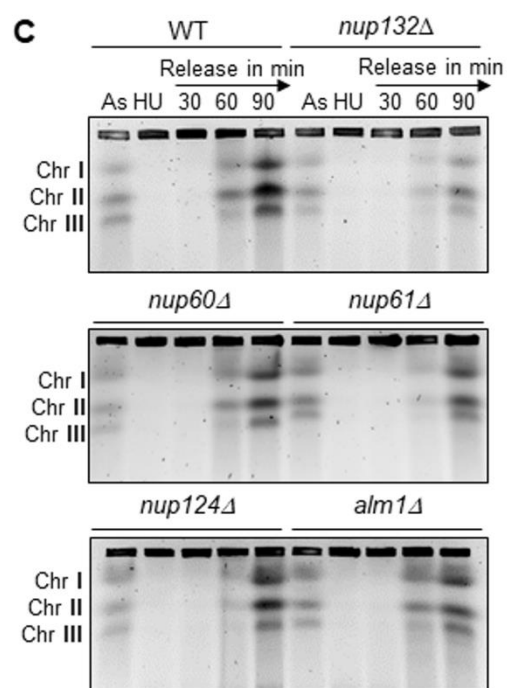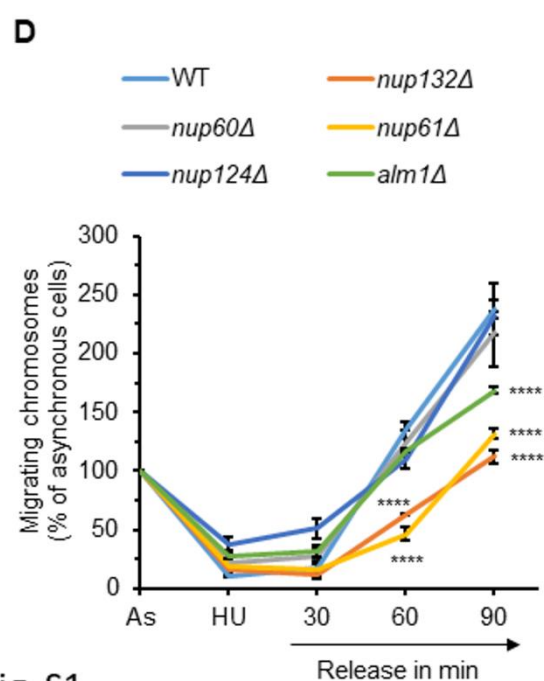

Fig. S1

**Figure S1: Role of the nuclear basket in the recovery from HU-induced stalled forks.**

**A.** Sensitivity of indicated strains to indicated genotoxic drugs. Ten-fold serial dilutions of exponential cultures were dropped on appropriate plates. Bleo: bleomycin; CPT: camptothecin; HU: hydroxyurea; MMS: methyl methane sulfonate.

**B.** Flow cytometry analysis of indicated strains in indicated conditions. Logarithmically growing cells (AS: Asynchronous cells) were exposed to 20 mM HU for 4 hours (HU time point) and then released into fresh, HU-free, rich medium YES at 30°C to monitor S-phase progression at the indicated time after release. Arrows indicate the delay in S phase progression compared to *WT*.

**C.** Analysis of chromosomes by pulse field gel electrophoresis (PFGE) in the above-mentioned conditions (as in b). Representative images of chromosome migration during PFGE in indicated strains and conditions.

**D.** Quantification of % of chromosomes migrating into the gel after release from HU block. Values are means of two independent biological replicates  $\pm$  standard deviation (SD). *p* value was calculated by two-sided Fisher's exact test (\*\*\*\*  $p \leq 0.0001$ ).

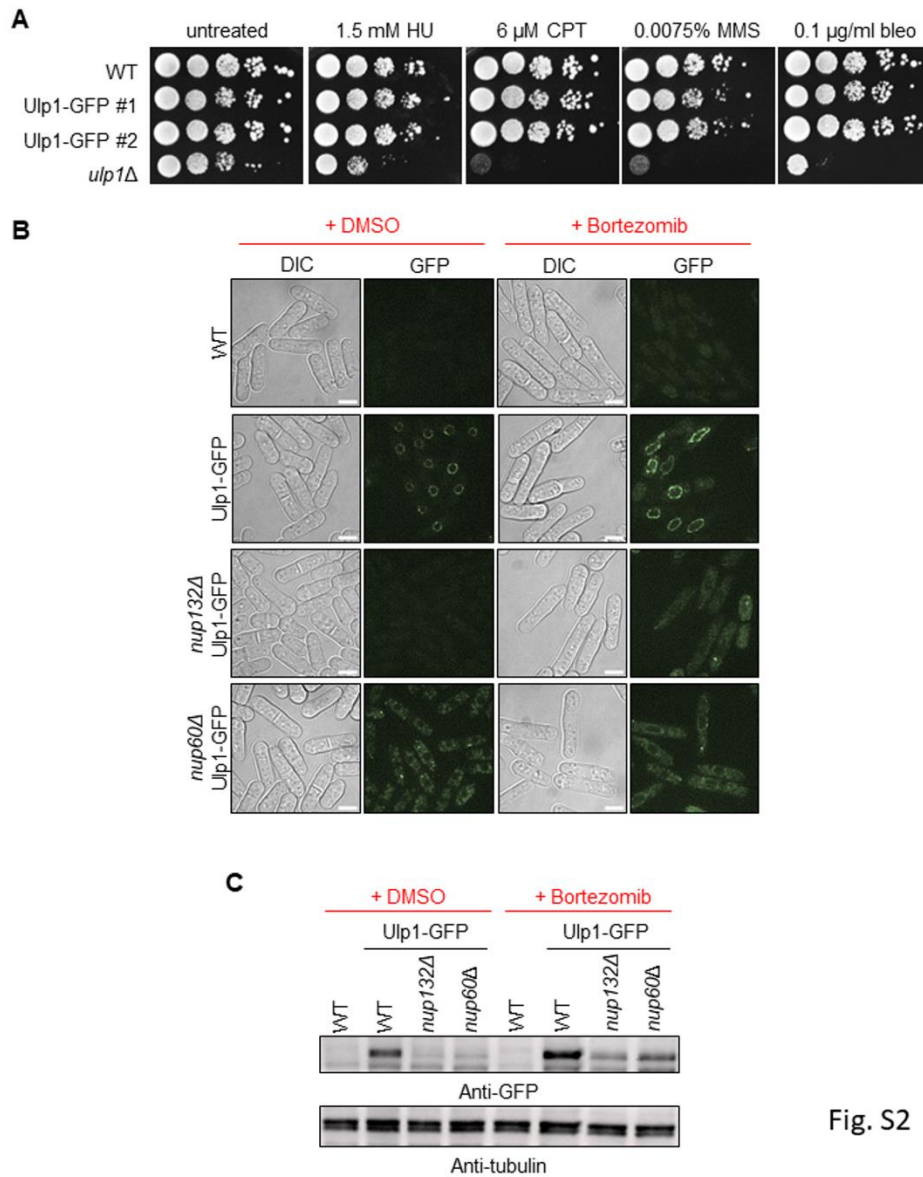

Fig. S2

**Figure S2: The downregulation of Ulp1 expression is caused by the proteasome.**

**A.** Ulp1-GFP is a functional fusion protein. Ten-fold serial dilutions of exponential cultures were dropped on appropriate plates. Bleo: bleomycin; CPT: camptothecin; HU: hydroxyurea; MMS: methyl methane sulfonate.

**B.** Cell imaging of Ulp1-GFP in indicated strains and conditions. Representative cell images of Ulp1-GFP in indicated strains in presence or absence of bortezomib. Scale bar: 5 $\mu$ m.

**C** Expression of Ulp1-GFP in indicated strains and conditions. An untagged WT strain was included as a control for antibody specificity. Tubulin was used as a loading control.

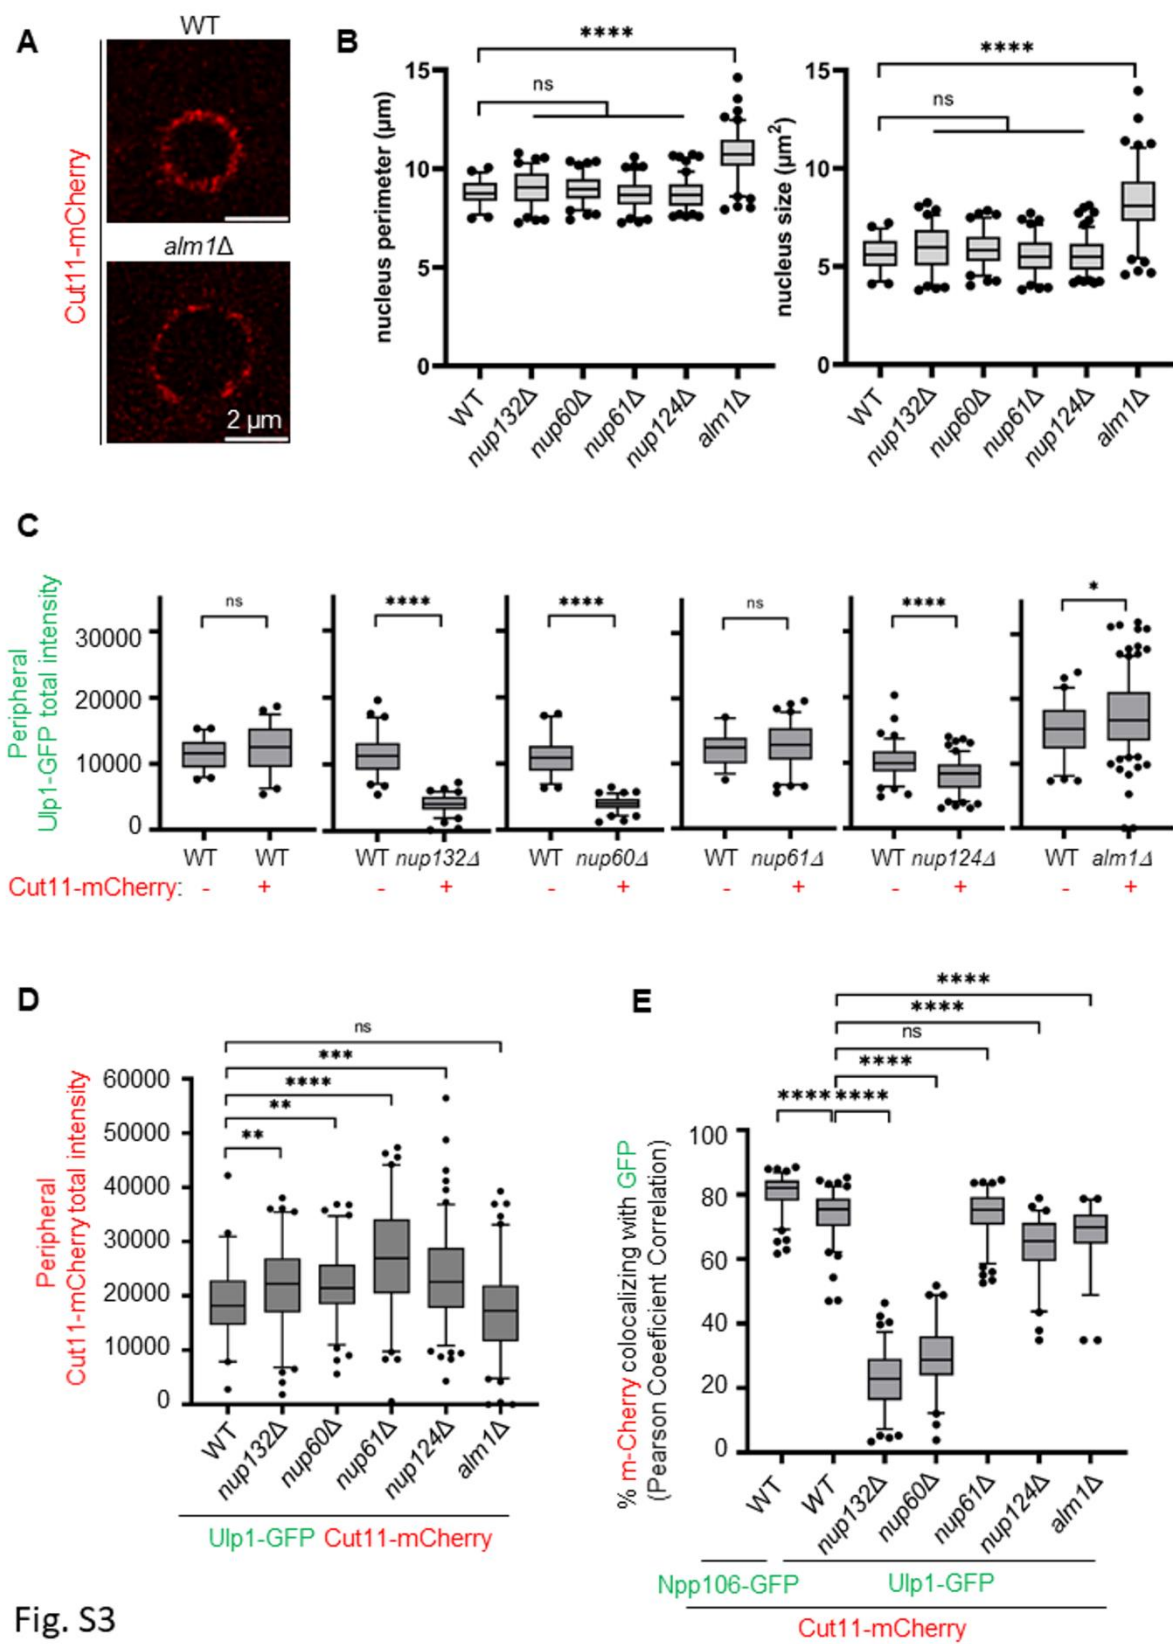

Fig. S3

**Figure S3: Image quantification of nuclear morphology parameters, Ulp1-GFP and Cut11-mCherry intensity.**

**A.** Example of fluorescence images of nuclei in cells expressing the endogenous Cut11-mCherry fusion protein in indicated strains. Scale bare 2  $\mu\text{m}$ .

**B.** Box-and-whisker plots of nucleus perimeter (left panel) and nucleus size (right panel) in indicated strains. Boxes represent the 25/75 percentile, black lines indicate the median, the whiskers indicate the 5/95 percentile and dots correspond to minimum and maximum values.  $p$  value was calculated by Mann-Whitney U test (\*\*\*\*  $p \leq 0.0001$ ; ns: non-significant). At least 50 nuclei were analyzed for each strain.

**C.** Box-and-whisker plots of Ulp1-GFP total intensity (raw integrated density) at the nuclear periphery in indicated strains and conditions. Boxes represent the 25/75 percentile, black lines indicate the median, the whiskers indicate the 5/95 percentile and dots correspond to minimum and maximum values.  $p$  value was calculated by Mann-Whitney U test (\*\*\*\*  $p \leq 0.0001$ ; \*  $p \leq 0.05$ ; ns: non-significant). At least 50 nuclei were analyzed for each strain.

**D.** Box-and-whisker plots of Cut11-mCherry total intensity (raw integrated density) at the nuclear periphery in indicated strains and conditions. Boxes represent the 25/75 percentile, black lines indicate the median, the whiskers indicate the 5/95 percentile and dots correspond to minimum and maximum values.  $p$  value was calculated by Mann-Whitney U test (\*\*\*\*  $p \leq 0.0001$ ; \*\*\*  $p \leq 0.001$ ; \*\*  $p \leq 0.01$ ; ns: non-significant). At least 50 nuclei were analyzed for each strain.

**E.** Box-and-whisker plots of co-localization between Cut11-mCherry and Ulp1-GFP (using the Pearson correlation coefficient) in indicated strains. The co-localization between the Npp106-GFP, an inner ring nucleoporin of NPC, and Cut11-mCherry, was performed as a control to show maximum correlation between intensities of both proteins at the resolution achieved on the images. Boxes represent the 25/75 percentile, black lines indicate the median, the whiskers indicate the 5/95 percentile and dots correspond to minimum and maximum values.  $p$  value was calculated by Mann-Whitney U test (\*\*\*\*  $p \leq 0.0001$ ; ns: non-significant). At least 50 nuclei were analyzed for each strain.

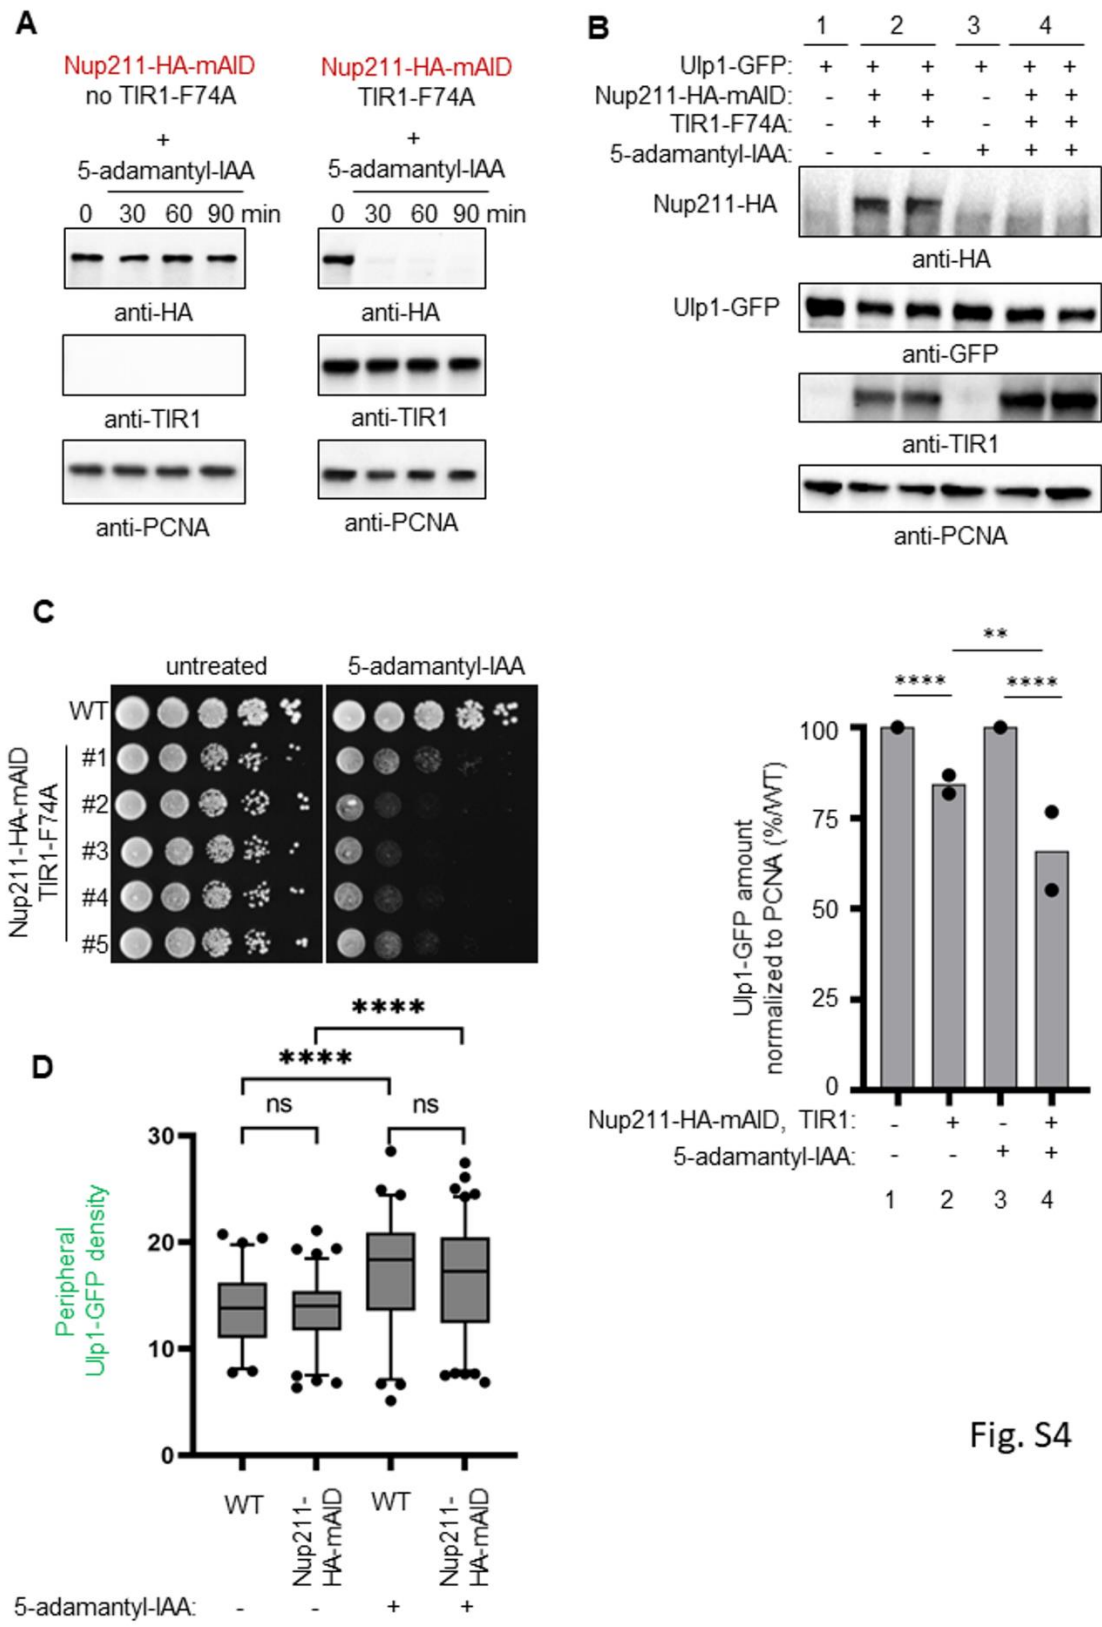

Fig. S4

**Figure S4: An auxin-induced degron approach to conditionally downregulate Nup211.**

**A.** Expression of Nup211-HA-mAID fusion protein in strains expressing TIR1-F74A (right panels) or not (left panels) as a function of time (in minute) upon addition of 5-adamantyl-IAA. PCNA was used as a loading control.

**B.** Top panels: expression of Ulp1-GFP, Nup211-HA-mAID and TIR1 in indicated conditions. PCNA was used as loading control. Bottom panel: quantification. Dots represent values obtained from independent biological experiments. The normalized amount of Ulp1 was calculated by dividing the GFP signal by PCNA. The normalized amount of Ulp1-GFP in mutants was indicated as a percentage of the *WT*. *p* value was calculated by two-sided Fisher's exact test (\*\*\*\*  $p \leq 0.0001$ ; \*\*  $p \leq 0.01$ ).

**C.** Cell growth assay of indicated strains. Ten-fold serial dilutions of exponential cultures were dropped on plates containing 5-adamantyl-IAA (right panel) or not (left panel). Five independent clones expressing Nup211-HA-mAID were tested alongside the *WT* strain. Note the cell growth defect of Nup211-HA-mAID strains in the absence of 5-adamantyl-IAA is indicative of a lack of Nup211 functionality.

**D.** Box-and-whisker plots of Ulp1-GFP density (mean fluorescence intensity) at the nuclear periphery in indicated strains and conditions. Boxes represent the 25/75 percentile, black lines indicate the median, the whiskers indicate the 5/95 percentile and dots correspond to minimum and maximum values. *p* value was calculated by Mann-Whitney U test (\*\*\*\*  $p \leq 0.0001$ ; ns: non-significant). At least 50 nuclei were analyzed for each strain.



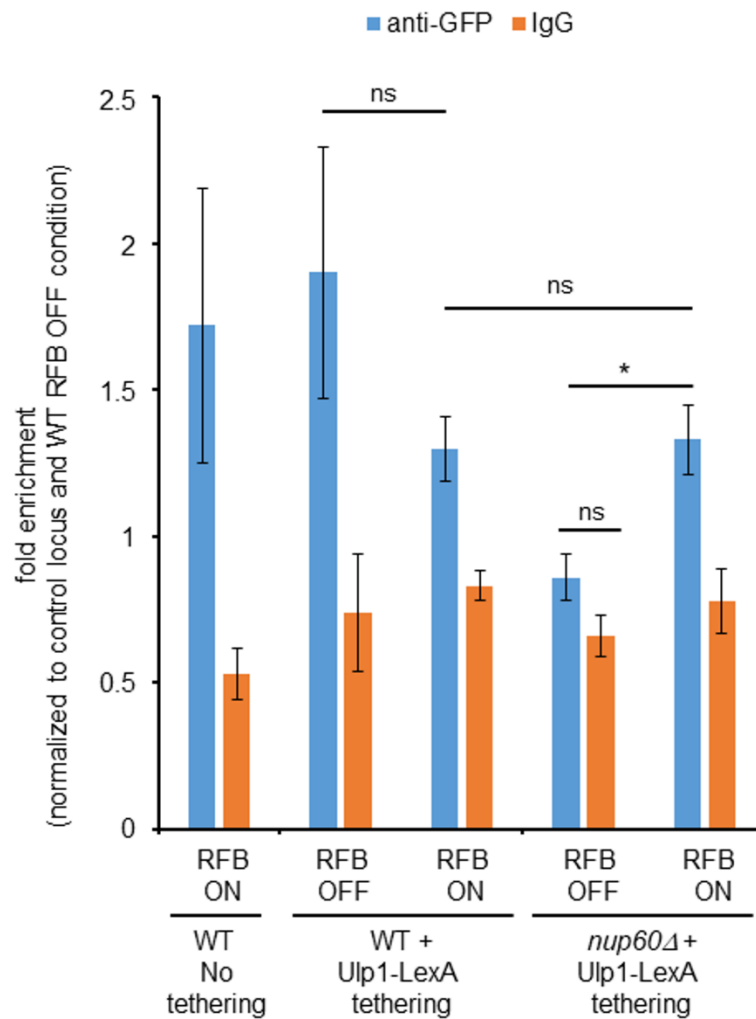

**Figure S5: Artificial targeting of Ulp1-LexA to LexA binding sites-containing RFB allows the tethering of the RFB to NPC in wild type and *nup60Δ* cells.**

The binding of Npp106-GFP to the RFB was analysed by chromatin immuno-precipitation (ChIP) followed by qPCR analysis using either anti-GFP antibody or IgG as control in indicated strains and conditions. Starting quantities were normalized to a control and unrelated locus and to Wild type RFB Off condition, in the absence of tethering. Values are the mean of 3 to 4 independent biological replicates, errors bars correspond to stander error of the mean (sem). Statistical difference was detected between the samples using the two-sided *t*-test. \*  $p < 0.05$ .

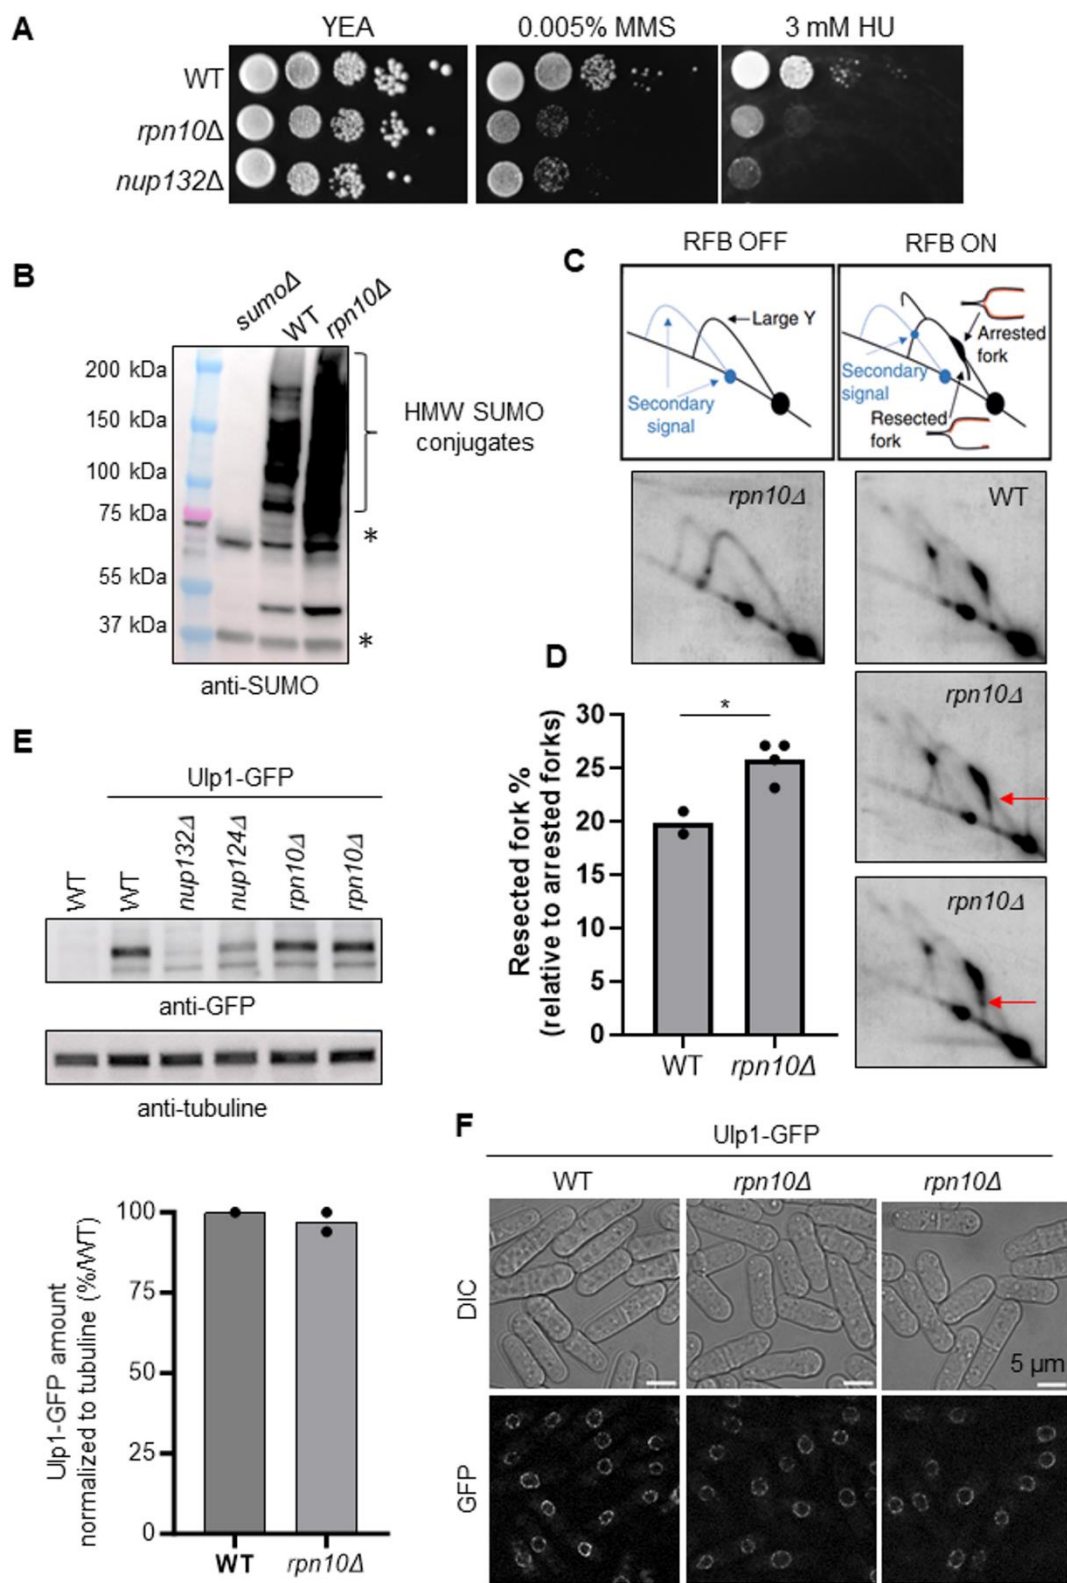

Fig. S6

**Figure S6: Characterization of *rpn10* mutant.**

**A.** The absence of Rpn10 results in cell sensitivity to replication blocking agents. Ten-fold serial dilutions of exponential cultures were dropped on appropriate plates. HU: hydroxyurea; MMS: methyl methane sulfonate.

**B.** Expression of SUMO conjugates in indicated strains. A strain deleted for *pmt3* gene that encodes the SUMO polypeptide (*sumoΔ*) was added as control for antibody specificity. \* indicates unspecific signal.

**C.** Top panel: scheme of replication intermediates (RI) analyzed by neutral-neutral 2DGE of the *AseI* restriction fragment in RFB OFF and ON conditions. Partial restriction digestion caused by psoralen-crosslinks results in a secondary arc indicated on scheme by blue dashed lines. Bottom panels: representative RI analysis in indicated strains and conditions. The *ura4* gene was used as a probe. The red arrow indicates the tail signal resulting from resected forks.

**D.** Quantification of resected forks in indicated strains. Dots represent values obtained from independent biological experiments. Statistical difference was detected between the samples using the two-sided *t*-test. \*  $p < 0.05$ .

**E.** Top panel: expression of Ulp1-GFP in indicated strains. An untagged *WT* strain was included as control for antibody specificity. Tubulin was used as a loading control. Bottom panel: quantification. The normalized amount of Ulp1 was calculated by dividing the GFP signal by tubulin signal. The normalized amount of Ulp1-GFP in the mutants is indicated as a percentage of the *WT*. Dots represent values obtained from independent biological experiments.

**F.** Example of fluorescence (bottom panel) and bright-field images (top panel, DIC) of cells expressing the endogenous Ulp1-GFP fusion protein in indicated strains. Scale bare 5  $\mu\text{m}$ .

Supplementary Table 1: strain list

| Strain number | Mating type | Genotype                                                                                                                                 | Reference  |
|---------------|-------------|------------------------------------------------------------------------------------------------------------------------------------------|------------|
| KK1467        | <i>h</i> -  | <i>LoxP-cdc6-L591G-LoxM3 rtf1::Nat loxP-rnh201RED:KAN-loxM3 ChrII-8535:Rura RTS1::phleo ura4-D18 ade6-704 leu1-32</i>                    | this study |
| KK1470        | <i>h</i> -  | <i>LoxP-cdc6-L591G-LoxM3 Nat:ADH1:rtf1 loxP-rnh201-RED:Kan-loxM3 ChrII-8535:Rura RTS1::phleo ura4-D18 ade6-704 leu1-32</i>               | this study |
| KK1473        | <i>h</i> -  | <i>loxP-cdc20-M630F-loxM3 rtf1::Nat loxP-rnh201RED:KAN-loxM3 ChrII-8535:Rura RTS1::phleo ura4-D18 ade6-704 leu1-32</i>                   | this study |
| KK1475        | <i>h</i> -  | <i>loxP-cdc20-M630F-loxM3 Nat:ADH1:rtf1 loxP-rnh201RED:KAN-loxM3 ChrII-8535:Rura RTS1::phleo ura4-D18 ade6-704 leu1-32</i>               | this study |
| KK1899        | <i>h</i> -  | <i>nup132::Hygro LoxP-cdc6-L591G-LoxM3 rtf1::Nat loxP-rnh201RED:KAN-loxM3 ChrII-8535:Rura RTS1::phleo ura4-D18 ade6-704 leu1-32</i>      | this study |
| KK1901        | <i>h</i> -  | <i>nup132::Hygro LoxP-cdc6-L591G-LoxM3 Nat:ADH1:rtf1 loxP-rnh201RED:KAN-loxM3 ChrII-8535:Rura RTS1::phleo ura4-D18 ade6-704 leu1-32</i>  | this study |
| KK1903        | <i>h</i> -  | <i>nup132::Hygro loxP-cdc20-M630F-loxM3 rtf1::Nat loxP-rnh201RED:KAN-loxM3 ChrII-8535:Rura RTS1::phleo ura4-D18 ade6-704 leu1-32</i>     | this study |
| KK1905        | <i>h</i> -  | <i>nup132::Hygro loxP-cdc20-M630F-loxM3 Nat:ADH1:rtf1 loxP-rnh201RED:KAN-loxM3 ChrII-8535:Rura RTS1::phleo ura4-D18 ade6-704 leu1-32</i> | this study |
| KK1377        | <i>h</i> +  | <i>ade6-704 leu1-32 ura4-D18</i>                                                                                                         | this study |
| KK1557        | <i>h</i> +  | <i>nup132::Nat ade6-704 leu1-32 ura4-D18</i>                                                                                             | this study |
| KK1561        | <i>h</i> +  | <i>nup60::Hygro ade6-704 leu1-32 ura4-D18</i>                                                                                            | this study |
| KK1578        | <i>h</i> -  | <i>nup61::Hygro ade6-704 leu1-32 ura4-D1</i>                                                                                             | this study |
| KK1599        | <i>h</i> -  | <i>nup124::Hygro ade6-704 leu1-32 ura4-D18</i>                                                                                           | this study |
| KK1384        | <i>h</i> +  | <i>alm1::Hygro ade6-704 leu1-32 ura4-D18</i>                                                                                             | this study |
| KK1707        | <i>h</i> +  | <i>nmt41:rtf1:sup35 ade6-704 leu1-32 t- ura4-SD20&lt;ori (uraR)</i>                                                                      | this study |
| KK931         | <i>h</i> +  | <i>nup60::Hygro nmt41:rtf1:sup35 ade6-704 leu1-32 t- ura4-SD20&lt;ori (uraR)</i>                                                         | this study |
| KK953         | <i>h</i> +  | <i>nup61::Hygro nmt41:rtf1:sup35 ade6-704 leu1-32 t- ura4-SD20&lt;ori (uraR)</i>                                                         | this study |
| KK1593        | <i>h</i> +  | <i>nup124::Hygro nmt41:rtf1:sup35 ade6-704 leu1-32 t- ura4-SD20&lt;ori (uraR)</i>                                                        | this study |
| KK2556        | <i>h</i> -  | <i>rpn10::Hygro nmt41:rtf1:sup35 ade6-704 leu1-32 t- ura4-SD20&lt;ori (uraR)</i>                                                         | this study |

|               |           |                                                                                                                               |                      |
|---------------|-----------|-------------------------------------------------------------------------------------------------------------------------------|----------------------|
| <b>KK2564</b> | <i>h-</i> | <i>rpn10::Hygro nup60::Hygro nmt41:rtf1:sup35 ade6-704 leu1-32 t- ura4-SD20&lt;ori (uraR)</i>                                 | this study           |
| <b>KK2576</b> | <i>h-</i> | <i>alm1::Hygro nmt41:rtf1:sup35 ade6-704 leu1-32 t- ura4-SD20&lt;ori (uraR)</i>                                               | this study           |
| <b>KK2568</b> | <i>h+</i> | <i>alm1::Hygro nup60::Hygro nmt41:rtf1:sup35 ade6-704 leu1-32 t- ura4-SD20&lt;ori (uraR)</i>                                  | this study           |
| <b>KK300</b>  | <i>h+</i> | <i>npp106-GFP:Nat arg3::mCherry-Lacl nmt41:rtf1:sup35 ade6-704 leu1-32 t-LacO 7,9Kb:Kan:ura4*&lt;ori (uraR)</i>               | Kramarz et al., 2020 |
| <b>KK301</b>  | <i>h+</i> | <i>nup60::Hygro npp106-GFP:Nat arg3::mCherry-Lacl nmt41:rtf1:sup35 ade6-704 leu1-32 t-LacO 7,9Kb:Kan:ura4*&lt;ori (uraR)</i>  | this study           |
| <b>KK166</b>  | <i>h-</i> | <i>nup61::Hygro npp106-GFP:Nat arg3::mCherry-Lacl nmt41:rtf1:sup35 ade6-704 leu1-32 t-LacO 7,9Kb:Kan:ura4*&lt;ori (uraR)</i>  | this study           |
| <b>KK32</b>   | <i>h+</i> | <i>nup124::Hygro npp106-GFP:Nat arg3::mCherry-Lacl nmt41:rtf1:sup35 ade6-704 leu1-32 t-LacO 7,9Kb:Kan:ura4*&lt;ori (uraR)</i> | this study           |
| <b>KK1580</b> | <i>h-</i> | <i>alm1::Hygro npp106-GFP:Nat arg3::mCherry-Lacl nmt41:rtf1:sup35 ade6-704 leu1-32 t-LacO 7,9Kb:Kan:ura4*&lt;ori (uraR)</i>   | this study           |
| <b>KK687</b>  | <i>h-</i> | <i>ulp1::Kan nmt41:rtf1:sup35 ade6-704 leu1-32 t-ura4-SD20&lt;ori (uraR)</i>                                                  | this study           |
| <b>KK1553</b> | <i>h-</i> | <i>ulp1-GFP:Kan ade6-704 leu1-32 ura4-D18</i>                                                                                 | this study           |
| <b>KK2590</b> |           | <i>ulp1-GFP:Kan rpn::hygro ade6-704 leu1-32 ura4-D18</i>                                                                      | this study           |
| <b>KK1555</b> | <i>h-</i> | <i>nup132::Nat ulp1-GFP:Kan ade6-704 leu1-32 ura4-D18</i>                                                                     | this study           |
| <b>KK1560</b> | <i>h-</i> | <i>nup60::Hygro ulp1-GFP:Kan ade6-704 leu1-32 ura4-D18</i>                                                                    | this study           |
| <b>KK1575</b> | <i>h+</i> | <i>nup61::Hygro ulp1-GFP:Kan ade6-704 leu1-32 ura4-D18</i>                                                                    | this study           |
| <b>KK1596</b> | <i>h+</i> | <i>nup124::Hygro ulp1-GFP:Kan ade6-704 leu1-32 ura4-D18</i>                                                                   | this study           |
| <b>KK1996</b> | <i>h+</i> | <i>alm1::Hygro ulp1-GFP:Kan ade6-704 leu1-32 ura4-D18</i>                                                                     | this study           |
| <b>KK1562</b> | <i>h-</i> | <i>pmt3 ::Kan-ura4 nmt41:rtf1:sup35 ade6-704 leu1-32 t- ura4-SD20&lt;ori (uraR)</i>                                           | this study           |
| <b>KK2018</b> | <i>h+</i> | <i>SUMO-KallR (pmt3-KallR) ade6-704 leu1-32 ura4-D18</i>                                                                      | this study           |
| <b>KK1965</b> | <i>h-</i> | <i>ulp1-GFP:Kan cut11-mCherry:Hygro ade6-704 leu1-32 ura4-D18</i>                                                             | this study           |
| <b>KK1967</b> | <i>h+</i> | <i>nup132::Nat ulp1-GFP:Kan cut11-mCherry:Hygro ade6-704 leu1-32 ura4-D18</i>                                                 | this study           |
| <b>KK1970</b> | <i>h+</i> | <i>nup60::Hygro ulp1-GFP:Kan cut11-mCherry:Hygro ade6-704 leu1-32 ura4-D18</i>                                                | this study           |
| <b>KK2287</b> | <i>h-</i> | <i>nup61::Hygro ulp1-GFP:Kan cut11-mCherry:Hygro ade6-704 leu1-32 ura4-D18</i>                                                | this study           |
| <b>KK2309</b> | <i>h+</i> | <i>nup124::Hygro ulp1-GFP:Kan cut11-mCherry:Hygro ade6-704 leu1-32 ura4-D18</i>                                               | this study           |

|               |           |                                                                                                                                                    |                      |
|---------------|-----------|----------------------------------------------------------------------------------------------------------------------------------------------------|----------------------|
| <b>KK2071</b> | <i>h+</i> | <i>alm1::Hygro ulp1-GFP:Kan cut11-mCherry:Hygro ade6-704 leu1-32 ura4-D18</i>                                                                      | this study           |
| <b>KK2292</b> | <i>h-</i> | <i>npp106-GFP:Nat cut11-mCherry:Hygro ade6-704 leu1-32 ura4-D18</i>                                                                                | this study           |
| <b>KK1788</b> | <i>h+</i> | <i>nup211-mAID-HA-Turg1:Kan ade6-704 leu1-32 ura4-D18</i>                                                                                          | this study           |
| <b>KK1790</b> | <i>h+</i> | <i>nup211-mAID-HA-Turg1:Kan arg3::bleMX6-arg3+-padh1-OsTIR1F74A-Tadh1 ade6-704 leu1-32 ura4-D18</i>                                                | this study           |
| <b>KK1780</b> | <i>h+</i> | <i>ulp1-GFP:Kan nup211-mAID-HA-Turg1:Kan ade6-704 leu1-32 ura4-D18</i>                                                                             | this study           |
| <b>KK1782</b> | <i>h-</i> | <i>ulp1-GFP:Kan nup211-mAID-HA-Turg1:Kan arg3::bleMX6-arg3+-padh1-OsTIR1F74A-Tadh1 ade6-704 leu1-32 ura4-D18</i>                                   | this study           |
| <b>KK2273</b> | <i>h-</i> | <i>SUMO-KallR (pmt3-KallR) nmt41:rtf1:sup35 ade6-704 leu1-32 t-ura4-SD20&lt;ori (uraR)</i>                                                         | Kramarz et al., 2020 |
| <b>KK2281</b> | <i>h-</i> | <i>nup60::Hygro SUMO-KallR (pmt3-KallR) nmt41:rtf1:sup35 ade6-704 leu1-32 t-ura4-SD20&lt;ori (uraR)</i>                                            | this study           |
| <b>KK2403</b> | <i>h-</i> | <i>alm1::Hygro SUMO-KallR (pmt3-KallR) nmt41:rtf1:sup35 ade6-704 leu1-32 t-ura4-SD20&lt;ori (uraR)</i>                                             | this study           |
| <b>KK2391</b> | <i>h+</i> | <i>rpn10::Hygro SUMO-KallR (pmt3-KallR) nmt41:rtf1:sup35 ade6-704 leu1-32 t-ura4-SD20&lt;ori (uraR)</i>                                            | this study           |
| <b>KK1631</b> | <i>h-</i> | <i>nmt41:rtf1:sup35 ade6-704 leu1-32 t-Kan-lexBS:ura4-SD20&lt;ori (uraR)</i>                                                                       | Kramarz et al., 2020 |
| <b>KK1635</b> | <i>h-</i> | <i>ulp1-lexA:Hygro nmt41:rtf1:sup35 ade6-704 leu1-32 t-Kan-lexBS:ura4-SD20&lt;ori (uraR)</i>                                                       | Kramarz et al., 2020 |
| <b>KK1639</b> | <i>h-</i> | <i>nup60::Hygro nmt41:rtf1:sup35 ade6-704 leu1-32 t-Kan-lexBS:ura4-SD20&lt;ori (uraR)</i>                                                          | this study           |
| <b>KK1642</b> | <i>h+</i> | <i>nup60::Hygro ulp1-lexA:Hygro nmt41:rtf1:sup35 ade6-704 leu1-32 t-Kan-lexBS:ura4-SD20&lt;ori (uraR)</i>                                          | this study           |
| <b>KK1769</b> | <i>h-</i> | <i>alm1::Hygro nmt41:rtf1:sup35 ade6-704 leu1-32 t-Kan-lexBS:ura4-SD20&lt;ori (uraR)</i>                                                           | this study           |
| <b>KK1772</b> | <i>h-</i> | <i>alm1::Hygro ulp1-lexA:Hygro nmt41:rtf1:sup35 ade6-704 leu1-32 t-Kan-lexBS:ura4-SD20&lt;ori (uraR)</i>                                           | this study           |
| <b>KK1192</b> | <i>h+</i> | <i>npp106-GFP:Nat arg3::mCherry-Lacl nmt41:rtf1:sup35 ade6-704 leu1-32 t-LacO 7,9Kb:Kan:ura4::LexBS&lt;ori (uraR)</i>                              | Kramarz et al., 2020 |
| <b>KK1193</b> | <i>h-</i> | <i>ulp1-lexA:Hygro npp106-GFP:Nat arg3::mCherry-Lacl nmt41:rtf1:sup35 ade6-704 leu1-32 t-LacO 7,9Kb:Kan:ura4::LexBS&lt;ori (uraR)</i>              | Kramarz et al., 2020 |
| <b>KK1854</b> | <i>h-</i> | <i>nup60::Hygro npp106-GFP:Nat arg3::mCherry-Lacl nmt41:rtf1:sup35 ade6-704 leu1-32 t-LacO 7,9Kb:Kan:ura4::LexBS&lt;ori (uraR)</i>                 | this study           |
| <b>KK1857</b> | <i>h-</i> | <i>nup60::Hygro ulp1-lexA:Hygro npp106-GFP:Nat arg3::mCherry-Lacl nmt41:rtf1:sup35 ade6-704 leu1-32 t-LacO 7,9Kb:Kan:ura4::LexBS&lt;ori (uraR)</i> | this study           |
| <b>KK1931</b> | <i>h-</i> | <i>alm1::Hygro npp106-GFP:Nat arg3::mCherry-Lacl nmt41:rtf1:sup35 ade6-704 leu1-32 t-LacO 7,9Kb:Kan:ura4::LexBS&lt;ori (uraR)</i>                  | this study           |
| <b>KK1929</b> | <i>h+</i> | <i>alm1::Hygro ulp1-lexA:Hygro npp106-GFP:Nat arg3::mCherry-Lacl nmt41:rtf1:sup35 ade6-704 leu1-32 t-LacO 7,9Kb:Kan:ura4::LexBS&lt;ori (uraR)</i>  | this study           |
| <b>KK1527</b> | <i>h-</i> | <i>rpn10::Hygro LoxP-cdc6-L591G-LoxM3 rtf1::Nat loxP-rnh201RED:KAN-loxM3 ChrII-8535:Rura RTS1::phleo ura4-D18 ade6-704 leu1-32</i>                 | this study           |

|               |           |                                                                                                                                         |            |
|---------------|-----------|-----------------------------------------------------------------------------------------------------------------------------------------|------------|
| <b>KK1868</b> | <i>h-</i> | <i>rpn10::Hygro LoxP-cdc6-L591G-LoxM3 Nat:ADH1:rtf1 loxP-rnh201RED:KAN-loxM3 ChrII-8535:Rura RTS1::phleo ura4-D18 ade6-704 leu1-32</i>  | this study |
| <b>KK1526</b> | <i>h-</i> | <i>rpn10::Hygro loxP-cdc20-M630F-loxM3 rtf1::Nat loxP-rnh201RED:KAN-loxM3 ChrII-8535:Rura RTS1::phleo ura4-D18 ade6-704 leu1-32</i>     | this study |
| <b>KK1894</b> | <i>h-</i> | <i>rpn10::Hygro loxP-cdc20-M630F-loxM3 Nat:ADH1:rtf1 loxP-rnh201RED:KAN-loxM3 ChrII-8535:Rura RTS1::phleo ura4-D18 ade6-704 leu1-32</i> | this study |

Supplementary Table 2: Primer list

| <b>Name</b>  | <b>Distance (bp) from the <i>RTS1</i>-RFB</b> | <b>sequence</b>           |
|--------------|-----------------------------------------------|---------------------------|
| <b>L5F</b>   | -110                                          | AGGGCATTAAAGGCTTATTTACAGA |
| <b>L5R</b>   | -110                                          | TCACGTTTAATTTCAAACATCCA   |
| <b>L3F</b>   | 110                                           | TTTAAATCAAATCTTCCATGCG    |
| <b>L3R</b>   | 110                                           | TGTACCCATGAGCAAACACTGC    |
| <b>L400F</b> | 400                                           | ATCTGACATGGCATTCTCA       |
| <b>L400R</b> | 400                                           | GATGCCAGACCGTAATGACA      |
| <b>II50F</b> | Intergenic locus on ChrII                     | CACCGCAGTTCTACGTATCCT     |
| <b>II50R</b> | Intergenic locus on ChrII                     | CGATGTAACGGTATGCGGTA      |
